# Supplementary material for: Heterogeneous bromination of alkenes using Bi(iii) polybromide complexes as {Br2} source
Source: Royal Society of Chemistry journal article supplement (doi:10.1039/c6ra10109g), 2016-01-01
Supplement: c6ra10109g1.pdf [file c6ra10109g1.pdf]

## Supplementary Information

### Heterogeneous bromination of alkenes using Bi(III) polybromide complexes as {Br<sub>2</sub>} source

S. A. Adonin,<sup>a,b</sup> D.S. Perekalin,<sup>c</sup> Igor D. Gorokh,<sup>b</sup> Denis G. Damsonenko,<sup>a,b</sup> Maxim N. Sokolov<sup>a,b</sup> and Vladimir P. Fedin<sup>a,b</sup>

#### Materials and methods

All reagents were obtained from commercial sources and used without additional purification. All procedures with HBr·Br<sub>2</sub> solution were carried out in a well-ventilated fume hood. The NMR spectra were measured on Bruker Avance 400 spectrometer at room temperature.

#### Synthesis of (PyH)<sub>3</sub>{[Bi<sub>2</sub>Br<sub>9</sub>](Br<sub>2</sub>)} (1)

200 mg (0.66 mmol) of BiOBr were dissolved in 2 ml of 2M HBr. Then 4 ml of solution of Br<sub>2</sub> (1M) in 2M HBr were added. Following that, a solution of pyridine (80 mcl, 1 mmol) in 3 ml of 2M HBr was added. Within 10-15 minutes, deep orange crystals of **1** started to form; the crude product was collected after keeping the reaction mixture overnight. Yield 80%, based on Bi.

#### Bromination experiments

Polybromide **1** or **2** (0.01 mmol), two different alkenes (0.01 mmol each), 1,3,5-tribromobenzene (3 mg, 0.01 mmol, internal standard) and CCl<sub>4</sub>/CDCl<sub>3</sub> mixture (0.4 ml + 0.2 ml) were stirred in the dark overnight at room temperature. During the reaction, the Bi(III) polybromide complex remains insoluble but there occurs the colour change from red to pale yellow. The solutions were transferred to NMR tube and <sup>1</sup>H NMR spectrum was recorded to determine the ration of reacted alkenes and produced dibromides.

#### Iodide-starch test

In a typical experiment, when small amount of dry precipitate (isolated from HBr/Br<sub>2</sub> medium) is put in a solution of NaI or KI and then a drop of starch solution is added, appearance of blue colour corresponds to oxidation of I<sup>-</sup> to I<sub>2</sub> by {Br<sub>2</sub>}.

### Formation/non-formation of polybromides

| Cation                                           | Result                                                                                                          | Iodine-starch test (IS)                                                                                                                                                                                                   |
|--------------------------------------------------|-----------------------------------------------------------------------------------------------------------------|---------------------------------------------------------------------------------------------------------------------------------------------------------------------------------------------------------------------------|
| protonated DABCO (1,4-diazabicyclo[2.2.2]octane) | Yellow solid                                                                                                    | Negative                                                                                                                                                                                                                  |
| Protonated urotropine                            | Yellow solid                                                                                                    | Negative                                                                                                                                                                                                                  |
| H <sub>2</sub> (4,4'-bipy)                       | Yellow solid, identified as (H <sub>2</sub> bipy) <sub>2</sub> [Bi <sub>2</sub> Br <sub>10</sub> ] by PXRD      | Negative                                                                                                                                                                                                                  |
| H <sub>2</sub> (2,2'-bipy)                       | Yellow solid with some pale orange inclusions                                                                   | Positive. One of the products of reactions was identified as polybromide (Hbipy)Br <sub>3</sub> by XRD. Most probably, there is a mixture of bromide complex and organic polybromide which gives the positive IS reaction |
| 4-EtPyH                                          | No formation of solid; there forms some instead                                                                 | n/a                                                                                                                                                                                                                       |
| N-BuPy                                           | Depending on the amount of Br <sub>2</sub> , there forms either pale yellow solid (IS negative) or deep-red oil | Negative or n/a                                                                                                                                                                                                           |

### X-ray diffractometry

Diffraction data for a single crystals of compound **1** were obtained at 130 K on an automated Agilent Xcalibur diffractometer equipped with a two-dimensional AtlasS2 detector (graphite monochromator,  $\lambda(\text{MoK}\alpha) = 0.71073 \text{ \AA}$ ,  $\omega$  scans). Integration, absorption correction, and determination of unit cell parameters were performed using the CrysAlisPro program package [1]. The structures were solved by a direct method and refined by the full-matrix least squares technique in the anisotropic approximation (except hydrogen atoms) using the SHELX-2014 software [2]. Positions of hydrogen atoms of organic molecules were calculated geometrically and refined in the riding model. Crystallographic data and diffraction experiment details are

given in Table 1. Selected interatomic distances and bond angles are presented in Table 2. Full structural data (atom coordinates, interatomic distances, bond angles, and thermal atomic displacement parameters) have been deposited with the Cambridge Structural Data Base (CCDC-1474709) and can also be obtained from the authors upon request.

[1] CrysAlisPro 1.171.38.41. Rigaku Oxford Diffraction. 2015.

[2] Sheldrick G. M. *Acta Crystallogr., Sect. A: Found. Crystallogr.* 2008, A64, 112.

Table S1. Crystal data and structure refinement for **1**.

| Identification code                      | <b>1</b>                                                                        |
|------------------------------------------|---------------------------------------------------------------------------------|
| Empirical formula                        | C <sub>15</sub> H <sub>18</sub> N <sub>3</sub> Bi <sub>2</sub> Br <sub>11</sub> |
| Formula weight                           | 1537.29                                                                         |
| Crystal system                           | <i>Monoclinic</i>                                                               |
| Space group                              | <i>P2<sub>1</sub>/m</i>                                                         |
| $a$ , Å                                  | 7.8459(2)                                                                       |
| $b$ , Å                                  | 23.3803(4)                                                                      |
| $c$ , Å                                  | 9.4868(2)                                                                       |
| $\beta$ , deg.                           | 110.370(3)                                                                      |
| $V$ , Å <sup>3</sup>                     | 1631.43(7)                                                                      |
| $Z$                                      | 2                                                                               |
| $D_{\text{calcd}}$ , g/cm <sup>3</sup>   | 3.129                                                                           |
| $\mu$ , mm <sup>-1</sup>                 | 24.254                                                                          |
| $F(000)$                                 | 1360                                                                            |
| Crystal size, mm                         | 0.16 × 0.11 × 0.03                                                              |
| $\theta$ range for data collection, deg. | 3.27–29.54                                                                      |

|                                             |                                                           |
|---------------------------------------------|-----------------------------------------------------------|
| Index ranges                                | $-7 \leq h \leq 9, -25 \leq k \leq 32, -12 \leq l \leq 9$ |
| Reflections collected                       | 8267                                                      |
| Independent reflections                     | 3879                                                      |
| $R_{\text{int}}$                            | 0.0221                                                    |
| Reflections with $I > 2\sigma(I)$           | 3420                                                      |
| Goodness-of-fit on $F^2$                    | 1.052                                                     |
| Final $R$ indices [ $I > 2\sigma(I)$ ]      | $R_1 = 0.0252, wR_2 = 0.0532$                             |
| $R$ indices (all data)                      | $R_1 = 0.0319, wR_2 = 0.0556$                             |
| Largest diff. peak / hole, $e/\text{\AA}^3$ | 1.274 / -1.085                                            |

---

Table S2. Selected bond lengths and angles for **1**.

| Bond              | <i>d</i> , Å    | Bond                            | <i>d</i> , Å    |
|-------------------|-----------------|---------------------------------|-----------------|
| Bi(1)–Br(1)       | 2.7094(5)       | Bi(1)–Br(5)                     | 3.0015(5)       |
| Bi(1)–Br(2)       | 2.7776(5)       | Bi(1)–Br(6)                     | 3.0444(5)       |
| Bi(1)–Br(3)       | 2.7064(5)       | Br(7)–Br(7) <sup>ii</sup>       | 2.3190(9)       |
| Bi(1)–Br(4)       | 3.0386(5)       | Br(2)–Br(7)                     | 3.1385(7)       |
| Angle             | $\omega$ , deg. | Angle                           | $\omega$ , deg. |
| Br(1)–Bi(1)–Br(2) | 89.002(16)      | Br(3)–Bi(1)–Br(4)               | 93.245(16)      |
| Br(1)–Bi(1)–Br(4) | 173.854(15)     | Br(3)–Bi(1)–Br(5)               | 92.609(16)      |
| Br(1)–Bi(1)–Br(5) | 93.673(16)      | Br(3)–Bi(1)–Br(6)               | 173.458(15)     |
| Br(1)–Bi(1)–Br(6) | 92.934(15)      | Br(4)–Bi(1)–Br(6)               | 82.599(14)      |
| Br(2)–Bi(1)–Br(4) | 95.604(16)      | Br(5)–Bi(1)–Br(4)               | 81.545(15)      |
| Br(2)–Bi(1)–Br(5) | 176.253(15)     | Br(5)–Bi(1)–Br(6)               | 81.810(15)      |
| Br(2)–Bi(1)–Br(6) | 95.446(16)      | Bi(1) <sup>i</sup> –Br(4)–Bi(1) | 81.179(16)      |
| Br(3)–Bi(1)–Br(1) | 90.819(16)      | Bi(1) <sup>i</sup> –Br(5)–Bi(1) | 82.397(17)      |
| Br(3)–Bi(1)–Br(2) | 89.972(16)      | Bi(1) <sup>i</sup> –Br(6)–Bi(1) | 80.993(15)      |

Symmetry transformations used to generate equivalent atoms: i)  $x, -y + \frac{1}{2}, z$ ; ii)  $-x, -y + 1, -z$ .
